# Supplementary material for: Chemical and Electrochemical Synthesis of Polypyrrole Using Carrageenan as a Dopant: Polypyrrole/Multi-Walled Carbon Nanotube Nanocomposites
Source: PubMed Central journal article supplement (PMC6403922; doi:10.3390/polym10060632), 2018-06-07

Supplementary Information

# Chemical and Electrochemical Synthesis of Polypyrrole Using Carrageenan as a Dopant: Polypyrrole/Multi-Walled Carbon Nanotube Nanocomposites

Mostafizur Rahaman <sup>1,\*</sup>, Ali Aldalbahi <sup>1,2,\*</sup>, Mohammed Almoiqli <sup>3</sup> and Shaykha Alzahly <sup>2</sup>

<sup>1</sup> Department of Chemistry, College of Science, King Saud University, Riyadh 11451, Saudi Arabia

<sup>2</sup> King Abdullah Institute for Nanotechnology, King Saud University, Riyadh 11451, Saudi Arabia; shaykha.alzahly@hotmail.com

<sup>3</sup> Nuclear Sciences Research Institute, King Abdulaziz City for Science and Technology, Riyadh 11442, Saudi Arabia; almoiqli@kacst.edu.sa

\* Correspondence: mrahaman@ksu.edu.sa (M.R.); aaldalbahi@ksu.edu.sa (A.A.); Tel.: +966-114-675-883 (M.R. & A.A.)

## S1: Solubility of Ppy-IC Composite

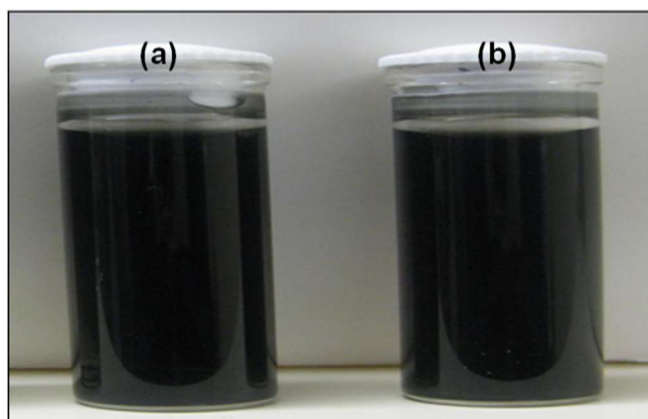

**Figure S1.** Images showing the solubility of PPy-IC composite solutions in: (a) Milli-Q water and (b) DMSO.

### S2: Photographs of Ppy-Carrageenan Film

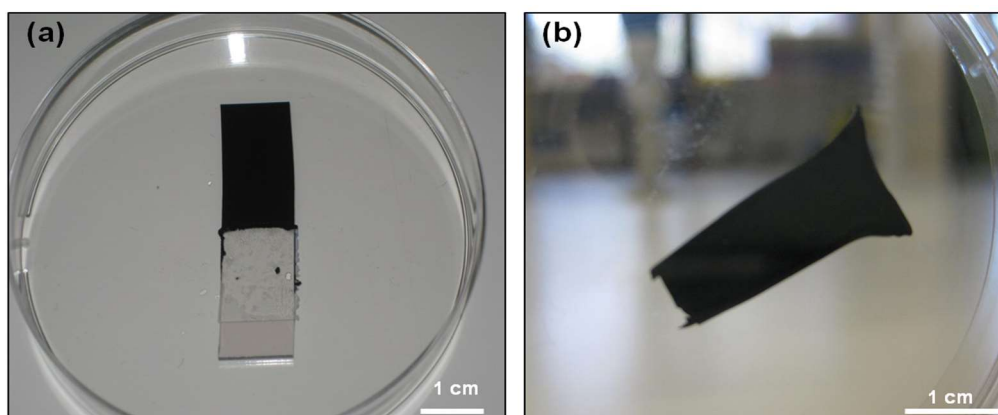

**Figure S2.** Photographs of (a) PPy-carrageenan film deposited onto ITO glass after the polymerization and (b) the film after peeling off from the ITO glass.

### S3: Free-Standing Films Prepared by Evaporative Casting

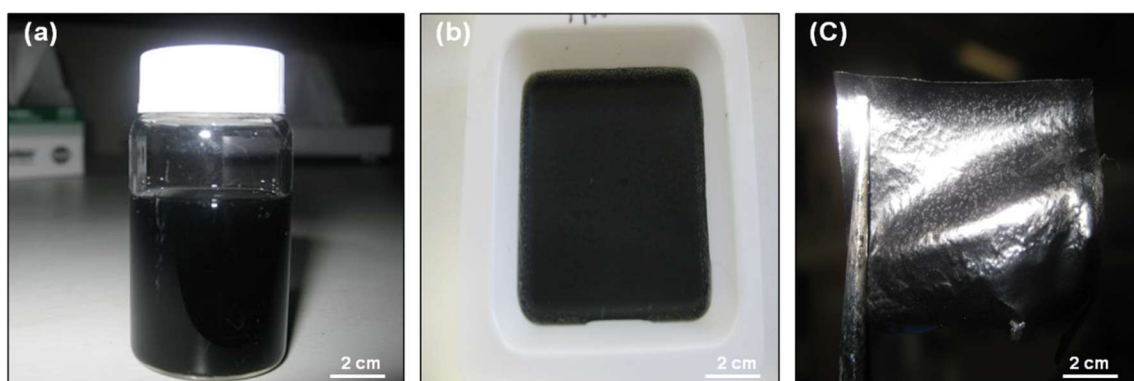

**Figure S3.** Photographs of (a) PPy-IC composite solution, (b) PPy-IC composite solution during the evaporation into the plastic substrate and (c) PPy-IC composite film after peeling off from the plastic substrate.

© 2018 by the authors. Submitted for possible open access publication under the terms and conditions of the Creative Commons Attribution (CC BY) license (<http://creativecommons.org/licenses/by/4.0/>).

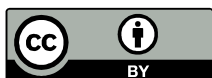

Supplement: polymers-10-00632-s001.pdf [file polymers-10-00632-s001.pdf]
